# Supplementary material
Source: PubMed Central journal article supplement (PMC4892791)
Supplement: rspb20160206supp4.pdf [file rspb20160206supp4.pdf]

**Table I: BrdU 24h-labeling index of coral and dinoflagellate cells**

| Tissue                      | Planula       |    |               | Early metamorphosis |    |               | Primary polyp |    |               | Adult       |    |               |
|-----------------------------|---------------|----|---------------|---------------------|----|---------------|---------------|----|---------------|-------------|----|---------------|
|                             | mean          | SD | nuclei number | mean                | SD | nuclei number | mean          | SD | nuclei number | mean        | SD | nuclei number |
| pharynx                     | 2,3% ± 2,2%   |    | 5214          | 2,4% ± 1,2%         |    | 2575          | 19,3% ± 7,3%  |    | 1921          | 5,5% ± 2,0% |    | 3455          |
| pseudostratified epithelium | 1,4% ± 1,0%   |    | 64810         | 2,9% ± 2,6%         |    | 46583         | 2,9% ± 2,5%   |    | 27176         | 7,3% ± 1,6% |    | 5896          |
| calicodermis                | 0,4% ± 0,7%   |    | 10972         | 2,2% ± 3,8%         |    | 14498         | 0,4% ± 0,4%   |    | 11362         | 2,5% ± 2,2% |    | 345           |
| gastrodermis                | 5,7% ± 4,4%   |    | 46796         | 4,7% ± 1,5%         |    | 12713         | 11,1% ± 6,7%  |    | 24513         | 3,8% ± 1,6% |    | 7885          |
| dinoflagellates             | 29,5% ± 20,9% |    | 1793          | 10,0% ± 15,2%       |    | 669           | 20,8% ± 12,8% |    | 1204          | 9,8% ± 4,8% |    | 737           |

nuclei pooled from 2-6 sections per replicate, 3-5 replicates per timepoint

**Table II: Apoptotic index of coral and dinoflagellate cells**

| Tissue                      | Planula      |    |               | Early metamorphosis |    |               | Primary polyp |    |               | Adult         |    |               |
|-----------------------------|--------------|----|---------------|---------------------|----|---------------|---------------|----|---------------|---------------|----|---------------|
|                             | mean         | SD | nuclei number | mean                | SD | nuclei number | mean          | SD | nuclei number | mean          | SD | nuclei number |
| pharynx                     | 0,6% ± 0,4%  |    | 2121          | 1,1% ± 0,7%         |    | 1496          | 2,5% ± 2,1%   |    | 1053          | 0,5% ± 0,4%   |    | 1168          |
| pseudostratified epithelium | 0,6% ± 0,4%  |    | 7021          | 0,7% ± 0,5%         |    | 8219          | 1,0% ± 0,9%   |    | 5992          | 1,4% ± 1,1%   |    | 1300          |
| calicodermis                | 1,5% ± 1,5%  |    | 2139          | 1,4% ± 1,2%         |    | 4124          | 1,9% ± 1,1%   |    | 2493          | 2,6% ± 0,7%   |    | 657           |
| gastrodermis                | 3,3% ± 2,5%  |    | 4675          | 5,1% ± 2,4%         |    | 5136          | 4,1% ± 4,3%   |    | 3927          | 1,5% ± 0,7%   |    | 2120          |
| dinoflagellates             | 12,8% ± 6,7% |    | 172           | 11,3% ± 5,6%        |    | 149           | 34,5% ± 27,8% |    | 209           | 27,7% ± 11,6% |    | 172           |

nuclei pooled from 1-4 sections per replicate, 3 replicates per timepoint

**Table III: BrdU labeling index during the chase experiment**

| Tissue                      | Primary polyp (t0) |    |               | 48 h Chase   |    |               | 64 h Chase   |    |               |
|-----------------------------|--------------------|----|---------------|--------------|----|---------------|--------------|----|---------------|
|                             | mean               | SD | nuclei number | mean         | SD | nuclei number | mean         | SD | nuclei number |
| pharynx                     | 19,3% ± 7,3%       |    | 1921          | 19,8% ± 4,4% |    | 1756          | 11,4% ± 6,6% |    | 2848          |
| pseudostratified epithelium | 2,9% ± 2,5%        |    | 27176         | 15,6% ± 5,7% |    | 6886          | 2,3% ± 2,4%  |    | 10534         |
| calicodermis                | 0,4% ± 0,4%        |    | 11362         | 2,9% ± 2,5%  |    | 5188          | 1,0% ± 1,0%  |    | 2131          |
| gastrodermis                | 11,1% ± 6,7%       |    | 24513         | 10,9% ± 2,8% |    | 9032          | 3,5% ± 1,7%  |    | 6563          |
| dinoflagellates             | 20,8% ± 12,8%      |    | 1204          | 26,7% ± 4,4% |    | 656           | 25,1% ± 4,7% |    | 365           |

nuclei pooled from 4-6 sections per replicate, 2-5 replicates per time-point

**Table IV: Nuclei BrdU-labeling intensity**

| Tissue                      | Primary polyp |    |               | 48 h Chase  |    |               | 64 h Chase  |    |               |
|-----------------------------|---------------|----|---------------|-------------|----|---------------|-------------|----|---------------|
|                             | mean          | SD | nuclei number | mean        | SD | nuclei number | mean        | SD | nuclei number |
| pharynx                     | 0,94 ± 0,40   |    | 30            | 0,36 ± 0,12 |    | 30            | 0,18 ± 0,06 |    | 30            |
| pseudostratified epithelium | 1,04 ± 0,45   |    | 54            | 0,44 ± 0,21 |    | 60            | 0,26 ± 0,10 |    | 37            |
| calicodermis                | 0,57 ± 0,46   |    | 19            | 0,40 ± 0,12 |    | 21            | 0,28 ± 0,08 |    | 7             |
| gastrodermis                | 1,99 ± 1,13   |    | 59            | 0,98 ± 0,60 |    | 60            | 0,30 ± 0,17 |    | 58            |
| dinoflagellates             | 0,8 ± 0,6     |    | 30            | 0,8 ± 0,4   |    | 30            | 0,5 ± 0,3   |    | 30            |

7-60 nuclei measured per replicate, 3 replicates per time-point

**Table V: Mitotic index of dinoflagellates**

| dinoflagellates | Planula     |    |               | Early metamorphosis |    |               | Primary polyp |    |               | Adult       |    |               |
|-----------------|-------------|----|---------------|---------------------|----|---------------|---------------|----|---------------|-------------|----|---------------|
|                 | mean        | SD | nuclei number | mean                | SD | nuclei number | mean          | SD | nuclei number | mean        | SD | nuclei number |
|                 | 1,6% ± 0,7% |    | 1978          | 2,2% ± 1,2%         |    | 1168          | 6,3% ± 2,3%   |    | 1424          | 2,4% ± 0,9% |    | 1196          |

mitotic index evaluated in 2-8 sections per replicate, 3 replicates per time-point
